# Supplementary material for: Gut Microbiota Eubacterium callanderi Exerts Anti-Colorectal Cancer Activity
Source: PubMed Central journal article supplement (PMC9769849; doi:10.1128/spectrum.02531-22), 2022-11-30
Supplement: spectrum.02531-22-s0001.pdf [file spectrum.02531-22-s0001.pdf]

Microbiology spectrum

## **Gut Microbiota *Eubacterium callanderi* Exerts Anti-colorectal Cancer Activity**

**Seoung Woo Ryu<sup>a†</sup>, Ji-Sun Kim<sup>a†</sup>, Byeong Seob Oh<sup>a†</sup>, Won Jung Choi<sup>a</sup>, Seung Yeob Yu<sup>a</sup>,  
Jeong Eun Bak<sup>a</sup>, Seung-Hwan Park<sup>a</sup>, Se Won Kang<sup>a</sup>, Jiyoung Lee<sup>a</sup>, Won Yong Jung<sup>b</sup>,  
Jung-Sook Lee<sup>a</sup>, Ju Huck Lee<sup>a</sup>**

<sup>a</sup> Korean Collection for Type Cultures, Biological Resource Center, Korea Research Institute of Bioscience and Biotechnology, Jeongeup 56212, Republic of Korea

<sup>b</sup> Korean Bioinformation Center, Korea Research Institute of Bioscience and Biotechnology, Daejeon 34141, Republic of Korea.

† These authors have contributed equally to this work and share first authorship.

### **Correspondences:**

Jung-Sook Lee, [jslee@kribb.re.kr](mailto:jslee@kribb.re.kr), Ju Huck Lee, [juhuck@kribb.re.kr](mailto:juhuck@kribb.re.kr)

**Running Head: Anti-colorectal Cancer Activity of *E. callanderi***

## Supplementary Materials

### Supplementary Figures

**Figure S1.** Identification of *E. callanderi* KGMB02377. **(A)** Phylogenetic tree showing the position of *E. callanderi* KGMB02377 among the core species of the genus *Eubacterium* based on 16S rRNA sequences by the neighbor-joining, where the nucleotide substitution model of Kimura-2 parameter was employed. Numbers at nodes refer to bootstrap values (based on 1000 replicates, only values >50% are shown at branch points). Filled circles indicate that the corresponding nodes (groupings) were recovered by the neighbor-joining and maximum-likelihood methods. Bar, 2% sequence divergence. **(B)** Cell morphology of *E. callanderi* KGMB02377, as observed with transmission electron microscope (left) and scanning electron microscope (right).

**Figure S2.** *In vitro* screening of inhibitory activity of EcCFS against various diseases. **(A)** Anti-proliferation effect of EcECFS on HCT116 cells. **(B-D)** Inhibitory activity of EcCFS on inflammation parameters; NO production (B), IL-6 production (C), and TNF- $\alpha$  production (D) in LPS-treated RAW 264.7 cells. **(E)** *C. difficile* growth inhibition effect of EcCFS. **(F)** Inhibitory activity of EcCFS on adipogenic differentiation of 3T3-L1 cells. RCM was used as control in all assays.

**Figure S3.** Anti-proliferative activity of bioactive molecules **(A)** Dose-dependent anti-proliferative activity of butyrate in HCT116. **(B)** Dose-dependent anti-proliferative activity of GABA in HCT116. **(C)** pH effect on anti-proliferative activity of EcCFS aqueous phase. The butyrate concentration of EcCFS aqueous phase in pH 4.5 and pH 6.8 were 4.56 mM and 10.2 mM, respectively. **(D)** Synergistic anti-proliferation effects of butyrate and GABA in HCT116. 0.3 mM butyrate and 100 mM GABA were treated.

**Figure S4.** Schematic diagram showing the experimental design of the colorectal cancer murine models. **(A)** Schematic diagram of the orally administrated CRC murine model; PBS or *E. callanderi* were orally administrated ( $1 \times 10^8$  CFU/100 $\mu$ l/mouse/day) for 2 weeks prior to tumor injection. **(B)** Schematic diagram of peri-tumoral CRC murine model. Filled arrows indicate oral administration or peri-tumoral injection schedules, and empty arrow indicates the subcutaneous injection of CT26 ( $2 \times 10^5$  cells/50 $\mu$ l).

## Supplementary Tables

**Table S1.** The genome statistics of *E. callanderi* KGMB02377

| <b>Properties</b>         | <b>Values</b>   |
|---------------------------|-----------------|
| Genome assembly           |                 |
| Assemble method           | SPAdes 3.13.0   |
| Genome coverage           | 385.6 X         |
| Genome features           |                 |
| Genome size (bp)          | 4,673,496       |
| G+C content (mol%)        | 47.2            |
| No. of contigs            | 43              |
| rRNA genes (5S, 16S, 23S) | 5 (2, 1, 2)     |
| tRNA genes                | 43              |
| Open reading frame        | 4,429           |
| CDS assigned by COG       | 3,799           |
| GenBank Accession No.     | JAHMUG000000000 |

**Table S2.** Clusters of orthologous groups (COG) of proteins of *E. callanderi* KGMB02377

| <b>COG</b>   | <b>Description</b>                                           | <b>Number of Genes</b> | <b>%</b> |
|--------------|--------------------------------------------------------------|------------------------|----------|
| <b>J</b>     | Translation, ribosomal structure and biogenesis              | 154                    | 4.1%     |
| <b>K</b>     | Transcription                                                | 363                    | 9.6%     |
| <b>L</b>     | Replication, recombination and repair                        | 176                    | 4.6%     |
| <b>D</b>     | Cell cycle control, cell division, chromosome partitioning   | 27                     | 0.7%     |
| <b>O</b>     | Posttranslational modification, protein turnover, chaperones | 79                     | 2.1%     |
| <b>M</b>     | Cell wall/membrane/envelope biogenesis                       | 174                    | 4.6%     |
| <b>N</b>     | Cell motility                                                | 8                      | 0.2%     |
| <b>P</b>     | Inorganic ion transport and metabolism                       | 193                    | 5.1%     |
| <b>T</b>     | Signal transduction mechanisms                               | 226                    | 5.9%     |
| <b>C</b>     | Energy production and conversion                             | 242                    | 6.4%     |
| <b>G</b>     | Carbohydrate transport and metabolism                        | 218                    | 5.7%     |
| <b>E</b>     | Amino acid transport and metabolism                          | 299                    | 7.9%     |
| <b>F</b>     | Nucleotide transport and metabolism                          | 78                     | 2.1%     |
| <b>H</b>     | Coenzyme transport and metabolism                            | 141                    | 3.7%     |
| <b>I</b>     | Lipid transport and metabolism                               | 54                     | 1.4%     |
| <b>Q</b>     | Secondary metabolites biosynthesis, transport and catabolism | 33                     | 0.9%     |
| <b>R</b>     | General function prediction only                             | 0                      | 0.0%     |
| <b>S</b>     | Function unknown                                             | 1334                   | 35.0%    |
| <b>Total</b> |                                                              | 3799                   | 100%     |

**Table S3.** Concentration of butyrate and GABA in CFS of gut microbiota with anti-proliferative activity.

| <b>Butyrate and GABA<br/>-producing GM</b> | <b>Butyrate (mM)</b> | <b>GABA (mM)</b> | <b>Anti-proliferative effect on<br/>HCT116 (%)</b> |
|--------------------------------------------|----------------------|------------------|----------------------------------------------------|
| <i>E. callanderi</i> KGMB02377             | 10.20                | 14.78            | 54.42                                              |
| <i>Bacteroides</i> spp. 1                  | 0.90                 | 6.72             | 29.77                                              |
| <i>Bacteroides</i> spp. 2                  | 0.44                 | 12.49            | 26.39                                              |
| <i>Bacteroides</i> spp. 3                  | 1.32                 | 2.23             | 29.49                                              |
| <i>Bacteroides</i> spp. 4                  | 0.90                 | 13.53            | 32.84                                              |
| <i>Bacteroides</i> spp. 5                  | 0.46                 | 6.34             | 27.21                                              |
| <i>Parabacteroides</i> spp. 1              | 0.53                 | 11.33            | 33.38                                              |
| <i>Parabacteroides</i> spp. 2              | 0.54                 | 4.93             | 27.57                                              |

**A**

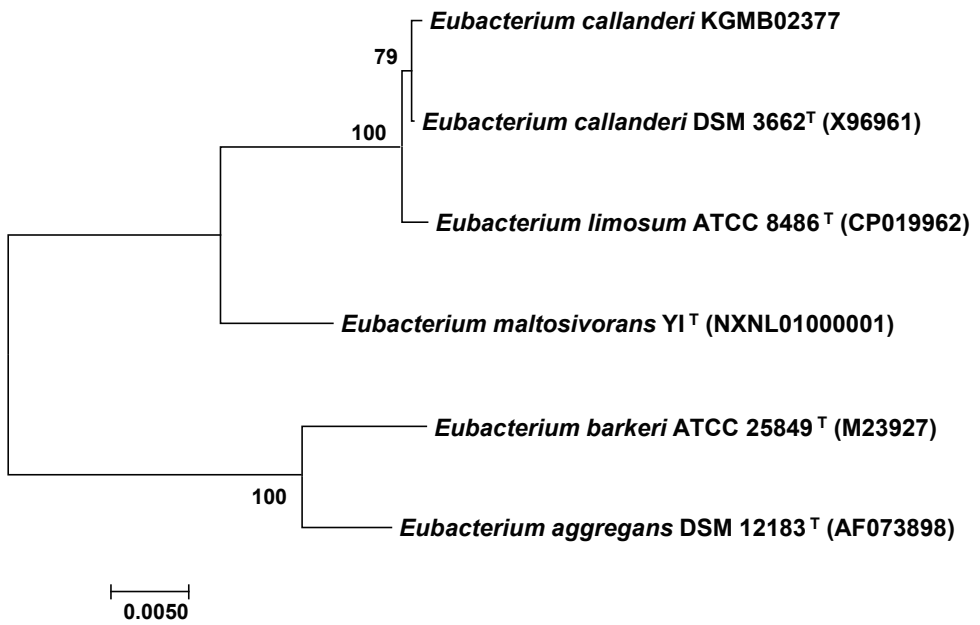

**B**

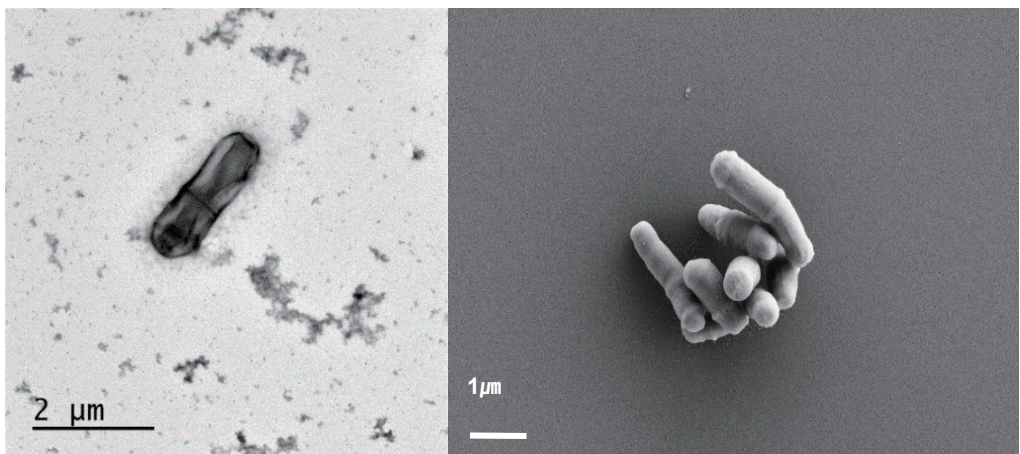

**Fig S1.**

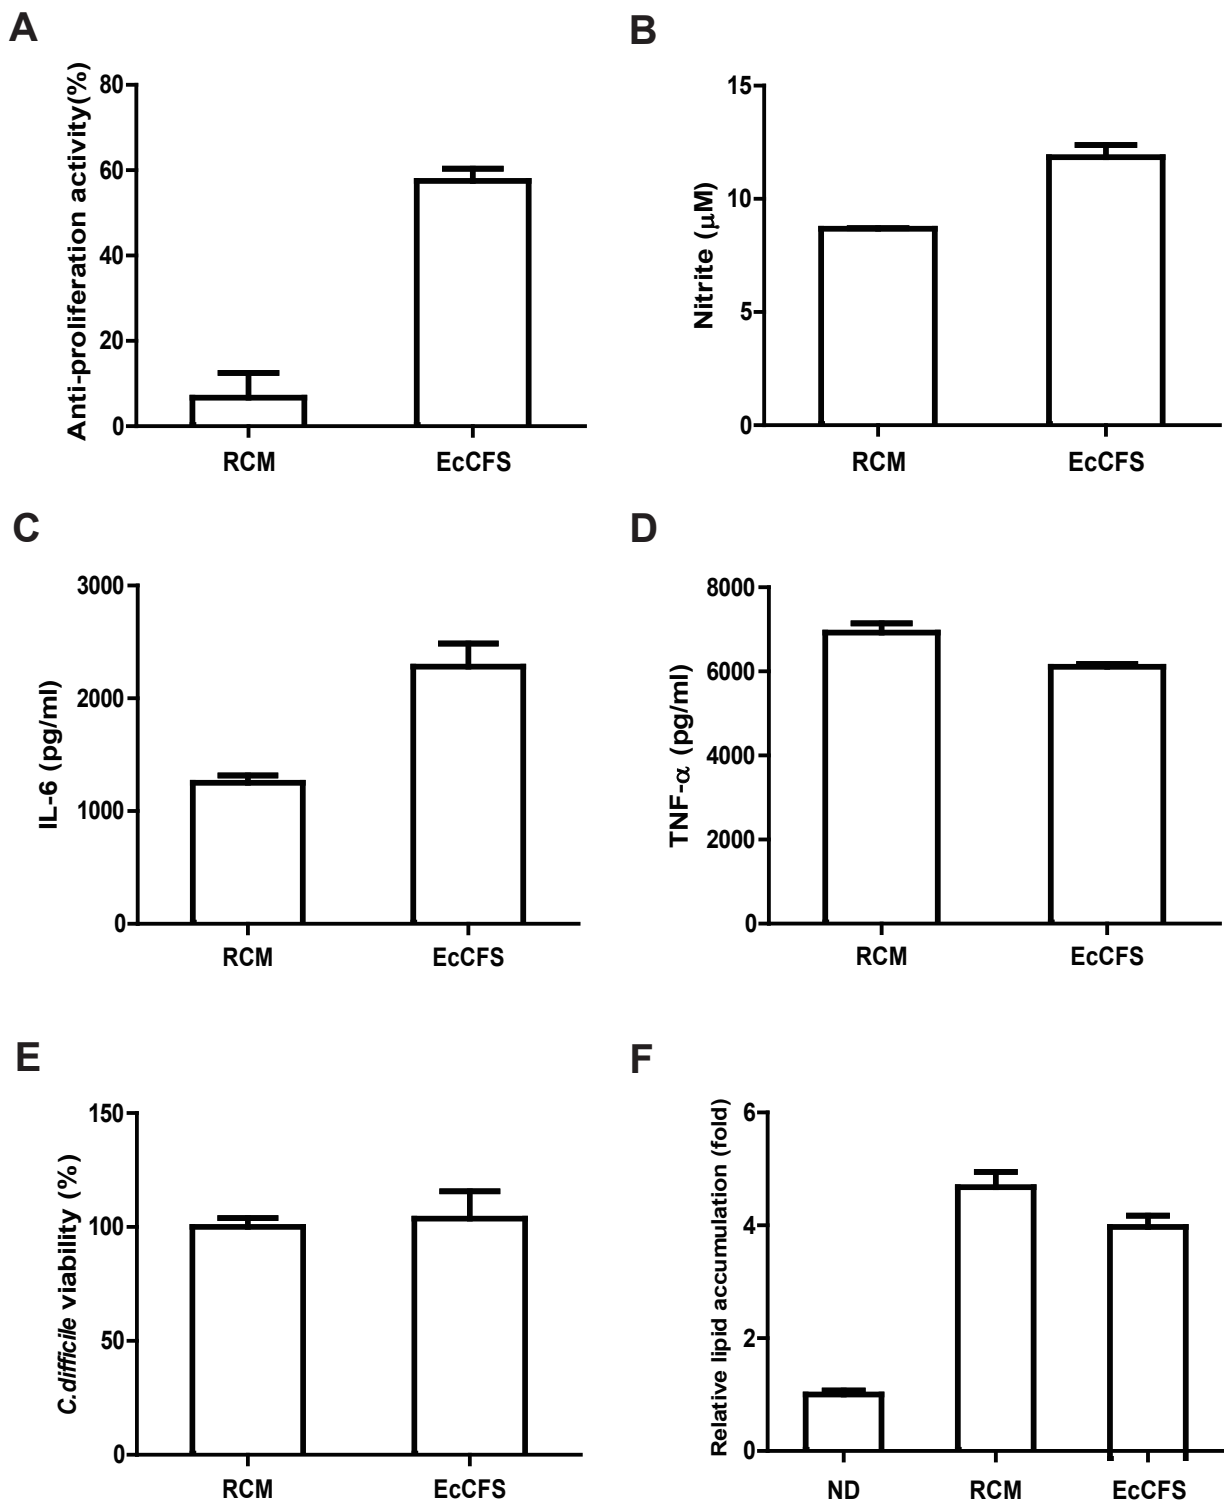

**Fig S2.**



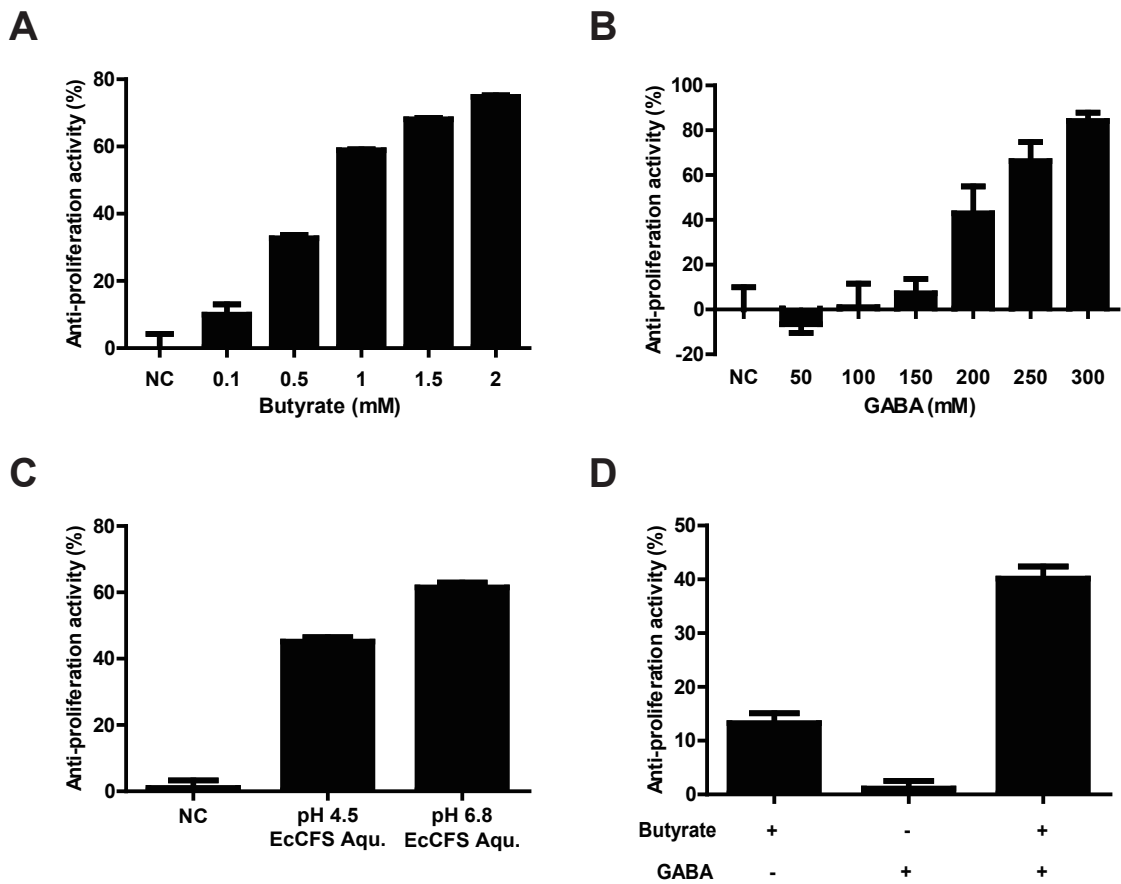

**Fig. S3**

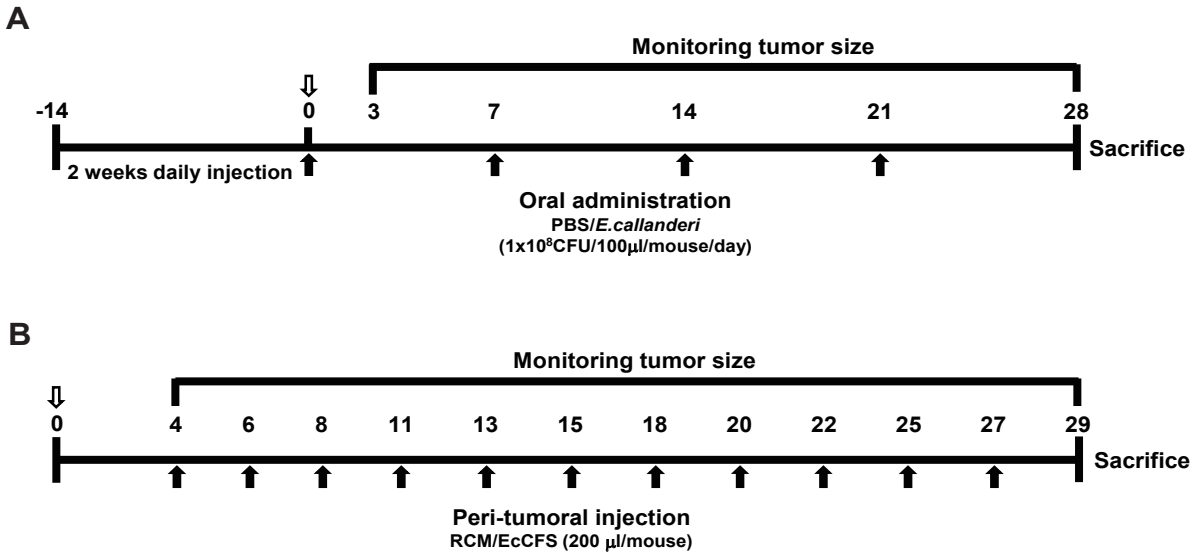

Fig S4.
